# Supplementary material
Source: MDPI journal article supplement (https://www.mdpi.com/1424-2818/9/3/34)
Supplement: s1 [file s1]

# Supplementary Materials: Table S1. Specifications of samples and d-loop PCR amplification success.

José David Granado Alonso \*, Simone Häberle, Heidemarie Hüster Plogmann, Jörg Schibler and Angela Schlumbaum

| Sample ID | Archaeological Code              | Skeletal Element      | Weight (mg) | Archaeological Site | City/Canton  | Dating       | Confirmation of <i>Coregonus</i> (D-loop) | Preservation environment | Depositional context |
|-----------|----------------------------------|-----------------------|-------------|---------------------|--------------|--------------|-------------------------------------------|--------------------------|----------------------|
| COR25     | Fk282, field 22                  | Scale                 | 7.3         | Stansstad-Kehrsiten | Kehrsiten/NW | 3500-3400 BC | Negative                                  | waterlogged              | Layer sample         |
| COR26     | Fk317, field 21                  | Scale                 | 4.2         | Stansstad-Kehrsiten | Kehrsiten/NW | 3500-3400 BC | Negative                                  | waterlogged              | Layer sample         |
| COR27     | Fk331, field 22                  | Vertebra              | 2.6         | Stansstad-Kehrsiten | Kehrsiten/NW | 3500-3400 BC | Negative                                  | waterlogged              | Layer sample         |
| COR28     | Fk331, field 22                  | Vertebra              | 2           | Stansstad-Kehrsiten | Kehrsiten/NW | 3500-3400 BC | Negative                                  | waterlogged              | Layer sample         |
| COR29     | Fk362, field 22                  | Vertebra              | 5           | Stansstad-Kehrsiten | Kehrsiten/NW | 3500-3400 BC | Negative                                  | waterlogged              | Layer sample         |
| COR30     | Fk362, field 22                  | Vertebra              | 4.7         | Stansstad-Kehrsiten | Kehrsiten/NW | 3500-3400 BC | Negative                                  | waterlogged              | Layer sample         |
| COR31     | Fk362, field 22                  | Scale                 | 7.6         | Stansstad-Kehrsiten | Kehrsiten/NW | 3500-3400 BC | Negative                                  | waterlogged              | Layer sample         |
| COR32     | Fk362, field 22                  | Scale                 | 6.7         | Stansstad-Kehrsiten | Kehrsiten/NW | 3500-3400 BC | Negative                                  | waterlogged              | Layer sample         |
| COR17     | Pk1028, Field 34                 | Scale <sup>1</sup>    | 2.5         | Arbon Bleiche 3     | Arbon/TG     | 3384-3370 BC | Positive                                  | waterlogged              | Cultural layers      |
| COR18     | Pk1028, Field 34                 | Scale <sup>1</sup>    | 2.6         | Arbon Bleiche 3     | Arbon/TG     | 3384-3370 BC | Positive                                  | waterlogged              | Cultural layers      |
| COR19     | Pk1028, Field 34                 | Scale <sup>1</sup>    | 3.6         | Arbon Bleiche 3     | Arbon/TG     | 3384-3370 BC | Positive                                  | waterlogged              | Cultural layers      |
| COR20     | Pk1029, Field 35                 | Scale <sup>1</sup>    | 4.4         | Arbon Bleiche 3     | Arbon/TG     | 3384-3370 BC | Negative                                  | waterlogged              | Cultural layers      |
| COR21     | Bk 4155, Field 27, layer 310     | Vertebra <sup>1</sup> | 38          | Arbon Bleiche 3     | Arbon/TG     | 3384-3370 BC | Positive                                  | waterlogged              | Cultural layers      |
| COR22     | Bk 4155, Field 27, layer 3104155 | Vertebra <sup>1</sup> | 14.5        | Arbon Bleiche 3     | Arbon/TG     | 3384-3370 BC | Positive                                  | waterlogged              | Cultural layers      |
| COR23     | Bk 4155, Field 27, layer 3104155 | Vertebra <sup>1</sup> | 26.9        | Arbon Bleiche 3     | Arbon/TG     | 3384-3370 BC | Positive                                  | waterlogged              | Cultural layers      |

|       |                                  |                       |      |                 |               |                    |          |             |                                     |
|-------|----------------------------------|-----------------------|------|-----------------|---------------|--------------------|----------|-------------|-------------------------------------|
| COR24 | Bk 4155, Field 27, layer 3104155 | Vertebra <sup>1</sup> | 23.5 | Arbon Bleiche 3 | Arbon/TG      | 3384-3370 BC       | Positive | waterlogged | Cultural layers                     |
| COR39 | Fk3645                           | Vertebra              | 26.1 | Arbon Bleiche 3 | Arbon/TG      | 3384-3370 BC       | Negative | waterlogged | Cultural layers                     |
| COR40 | Fk3645                           | Vertebra              | 33.2 | Arbon Bleiche 3 | Arbon/TG      | 3384-3370 BC       | Negative | waterlogged | Cultural layers                     |
| COR47 | Fk3925                           | Vertebra              | 16.9 | Arbon Bleiche 3 | Arbon/TG      | 3384-3370 BC       | Negative | waterlogged | Cultural layers                     |
| COR48 | Fk3925                           | Vertebra              | 17.6 | Arbon Bleiche 3 | Arbon/TG      | 3384-3370 BC       | Negative | waterlogged | Cultural layers                     |
| COR9  | Fk670, Pos. 214                  | Vertebra              | 26.8 | Römerblick      | Windisch/AG   | 1st century AD     | Negative | in dry      | Kitchen floor of a peristyle house  |
| COR10 | Fk979, Pos. 25.143, 5th Hp       | Vertebra              | 58.4 | Breite          | Windisch/AG   | 1st century AD     | Positive | in dry      | pit G13                             |
| COR11 | Fk1781, Pos. 34.195, 2nd Hp      | Scale                 | 1.9  | Breite          | Windisch/AG   | 1st century AD     | Positive | in dry      | Barrel pit                          |
| COR12 | Fk1781, Pos. 34.195, 2nd Hp      | Scale                 | 1.7  | Breite          | Windisch/AG   | 1st century AD     | Positive | in dry      | Barrel pit                          |
| COR13 | Fk1793, Pos. 35.129, 7th Hp      | Vertebra              | 44.1 | Breite          | Windisch/AG   | 1st century AD     | Positive | in dry      | pit                                 |
| COR14 | Fk4517, Bp4275                   | Vertebra              | 9.1  | Neftenbach      | Neftenbach/ZH | 3th/4th century AD | Positive | in dry      | Cesspit, construction 25            |
| COR15 | Fk4517, Bp4278                   | Vertebra              | 7.1  | Neftenbach      | Neftenbach/ZH | 3th/4th century AD | Negative | in dry      | Cesspit, construction 25            |
| COR16 | Fk4517, Bp4279                   | Vertebra              | 8    | Neftenbach      | Neftenbach/ZH | 3th/4th century AD | Positive | in dry      | Cesspit, construction 25            |
| COR33 | Bp1279a5, Pos. 767               | Vertebra              | 42.1 | Tomils          | Tomils/GR     | 7th century AD     | Negative | in dry      | Floor insulation structure, House G |
| COR34 | Bp1279a5, Pos. 767               | Vertebra              | 47.3 | Tomils          | Tomils/GR     | 7th century AD     | Negative | in dry      | Floor insulation structure, House G |
| COR35 | Bp1279a5, Pos. 767               | Vertebra              | 40.9 | Tomils          | Tomils/GR     | 7th century AD     | Negative | in dry      | Floor insulation structure, House G |
| COR36 | Bp2, layer 950                   | Vertebra              | 31.8 | Tomils          | Tomils/GR     | 7th century AD     | Negative | in dry      | Floor insulation structure, House F |
| COR37 | Bp22, layer 950                  | Vertebra              | 38.1 | Tomils          | Tomils/GR     | 7th century AD     | Negative | in dry      | Floor insulation structure, House F |
| COR38 | Bp22, layer 950                  | Vertebra              | 59.6 | Tomils          | Tomils/GR     | 7th century AD     | Negative | in dry      | Floor insulation structure, House F |

|       |                 |          |      |                                  |           |                      |          |        |                                                                    |
|-------|-----------------|----------|------|----------------------------------|-----------|----------------------|----------|--------|--------------------------------------------------------------------|
| COR1  | Bp381, Pos. 426 | Vertebra | 7.5  | Fraumünsterstrasse               | Zürich/ZH | 1010-1160 AD         | Negative | in dry | Occupation layer, context unclear                                  |
| COR2  | Bp381, Pos. 426 | Vertebra | 29.1 | Fraumünsterstrasse               | Zürich/ZH | 1010-1160 AD         | Positive | in dry | Occupation layer, context unclear                                  |
| COR3  | Bp382, Pos. 428 | Vertebra | 31   | Fraumünsterstrasse               | Zürich/ZH | 1020-1170 AD         | Positive | in dry | Filling of a fireplace, either in or outside a construction        |
| COR7  | Bp61.1          | Vertebra | 31   | Bäumleingasse 14                 | Basel/BS  | 13th century AD      | Positive | in dry | Cesspit, upper layer, outside a building (German: Latrinenschacht) |
| COR8  | Bp61.1          | Vertebra | 4.1  | Bäumleingasse 14                 | Basel/BS  | 13th century AD      | Positive | in dry | Cesspit, upper layer, outside a building (German: Latrinenschacht) |
| COR41 | Bp16, Pos.258   | Vertebra | 12.6 | Weesen Rosengärten               | Weesen/SG | 14th century AD      | Positive | in dry | Waste trench (German: Ehgraben)                                    |
| COR42 | Bp16, Pos.258   | Vertebra | 8.9  | Weesen Rosengärten               | Weesen/SG | 14th century AD      | Positive | in dry | Waste trench (German: Ehgraben)                                    |
| COR43 | Bp16, Pos.258   | Vertebra | 9.5  | Weesen Rosengärten               | Weesen/SG | 14th century AD      | Positive | in dry | Waste trench (German: Ehgraben)                                    |
| COR44 | Bp20, Pos. 258  | Vertebra | 27   | Weesen Rosengärten               | Weesen/SG | 14th century AD      | Positive | in dry | Waste trench (German: Ehgraben)                                    |
| COR45 | Bp21, Pos. 258  | Vertebra | 6    | Weesen Rosengärten               | Weesen/SG | 14th century AD      | Negative | in dry | Waste trench (German: Ehgraben)                                    |
| COR46 | Bp21, Pos. 258  | Vertebra | 14.1 | Weesen Rosengärten               | Weesen/SG | 14th cent. AD        | Positive | in dry | Waste trench (German: Ehgraben)                                    |
| COR4  | Bp78, Fk122920  | Vertebra | 7.8  | Museum der Kulturen, Im Schürhof | Basel/BS  | 15th/16th century AD | Positive | in dry | Cesspit 2, upper layer                                             |
| COR5  | Bp78, Fk122920  | Vertebra | 5.3  | Museum der Kulturen, Im Schürhof | Basel/BS  | 15th/16th century AD | Positive | in dry | Cesspit 2, upper layer                                             |
| COR6  | Bp78, Fk122920  | Vertebra | 3.8  | Museum der Kulturen, Im Schürhof | Basel/BS  | 15th/16th century AD | Negative | in dry | Cesspit 2, upper layer                                             |

<sup>1</sup> “Freshly” re-sampled from cold stored sediments as described in Materials and Methods.

Bp= Botanical sample after wet-sieving; Pk= sample from Pollen profile; Fk= archaeological structure code (German: Fundkomplex); Hp= Timber construction period; Pos.= position
